# Supplementary material for: Direct conversion of lignin to high-quality graphene-based materials via catalytic carbonization
Source: Royal Society of Chemistry journal article supplement (doi:10.1039/d1ra02491d), 2021-01-01
Supplement: d1ra02491d1.pdf [file d1ra02491d1.pdf]

## Direct conversion of lignin to high-quality graphene-based materials via catalytic carbonization

Takafumi Ishii<sup>a,\*</sup>, Mikaru Mori<sup>b</sup>, Shiguma Hisayasu<sup>c</sup>, Ryusuke Tamura<sup>c</sup>, Yuki Ikuta<sup>c</sup>, Fumito Fujishiro<sup>b,c</sup>, Jun-ichi Ozaki<sup>a</sup>, Hideyuki Itabashi<sup>d</sup>, Masanobu Mori<sup>b,c,\*</sup>

### Supporting Information

\*Corresponding author: Takafumi Ishii, Dr.

Telephone number: +81-277-30-1350

E-mail address: [ishii@gunma-u.ac.jp](mailto:ishii@gunma-u.ac.jp)

\*Corresponding author: Masanobu Mori, Dr.

Telephone number: +81-88-844-8306

E-mail address: [mori@kochi-u.ac.jp](mailto:mori@kochi-u.ac.jp)

---

<sup>a</sup> International Research and Education Center for Element Science, Faculty of Science and Technology, Gunma University, 1-5-1 Tenjin-cho, Kiryu, Gunma 376-8515, Japan.

<sup>b</sup> Faculty of Science and Technology, Kochi University, 2-5-1, Akebono-cho, Kochi 780-8072, Japan.

<sup>c</sup> Graduate School of Science and Technology, Kochi University, 2-5-1, Akebono-cho, Kochi 780-8072, Japan.

<sup>d</sup> Graduate School of Science and Technology, Gunma University, 1-5-1, Tenjin-cho, Kiryu, Gunma 376-8515, Japan

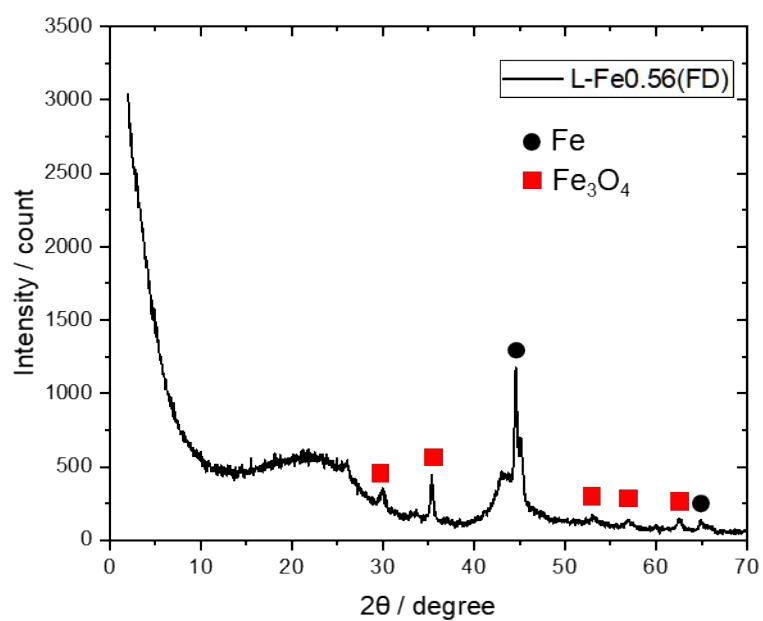

Figure S1. XRD pattern of L-Fe<sub>0.56</sub>(FD).

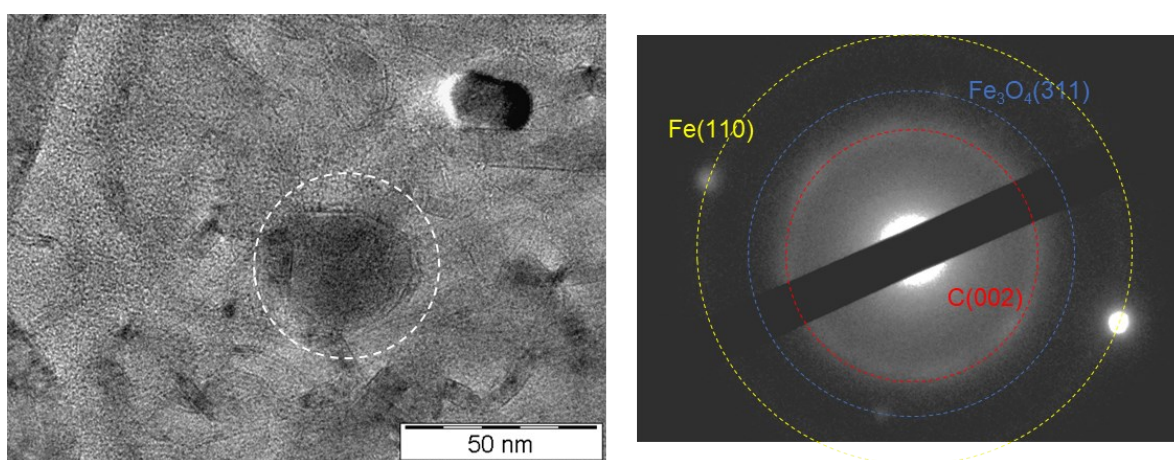

Figure S2. TEM image and SAED pattern of L-Fe<sub>0.56</sub>(FD). The SAED pattern was obtained from the region indicated by the white circle in the TEM image.
